# Supplementary material for: Diversification of Physical Activities: An Exploration of Provision Characteristics of Holistic Movement Practices in a Large Australian City
Source: MDPI journal article supplement (doi:10.3390/ijerph181910365), 2021-10-01
Supplement: s1 [file s1]

## Supplementary Table S4

Percentage of HMP-offering postcodes in different regions of Greater Melbourne

|                 | Smaller HMPs |       |                    | Tai Chi/Qigong |       |                    | Combined <sup>b</sup> |       |                    |
|-----------------|--------------|-------|--------------------|----------------|-------|--------------------|-----------------------|-------|--------------------|
|                 | n            | %     | % dif <sup>a</sup> | n              | %     | % dif <sup>a</sup> | n                     | %     | % dif <sup>a</sup> |
| Inner MB        | 15           | 28.8% | 17.6               | 17             | 16.2% | 4.9                | 23                    | 18.7% | 7.4                |
| Metropolitan MB | 27           | 51.9% | 14.8               | 41             | 39.0% | 2                  | 51                    | 41.5% | 4.4                |
| Outer MB        | 10           | 19.2% | -32.4              | 47             | 44.8% | -6.9               | 49                    | 39.8% | -11.8              |
| Total           | 52           | 100%  | 0                  | 105            | 100%  | 0                  | 123                   | 100%  | 0                  |

<sup>a</sup> %dif = difference between found % and expected % .if value is positive, the percentage of HMP-offering postcodes in that region is higher than expected based on a proportional representation; if negative, it is lower.

<sup>b</sup> combined is smaller than the sum of the smaller HMPs and Tai Chi/Qigong, because many postcode areas offered both practices.
