# Supplementary material for: Diversification of Physical Activities: An Exploration of Provision Characteristics of Holistic Movement Practices in a Large Australian City
Source: MDPI journal article supplement (doi:10.3390/ijerph181910365), 2021-10-01
Supplement: s1 [file s1]

### Supplementary Table S3

#### Description of Venue Types

|    | VENUE TYPE                           | Typically included:                                                                                                                                                                        |
|----|--------------------------------------|--------------------------------------------------------------------------------------------------------------------------------------------------------------------------------------------|
| 1  | Arts or Culture Centre/House         | Community arts or culture centre; museum                                                                                                                                                   |
| 2  | Body-Mind Fitness Studio             | Fitness studios that predominantly offer body-mind or mind-body practices (often Yoga/Pilates) but also include some other fitness activities, e.g. functional fitness                     |
| 3  | Bush Camp                            | Organised bush camps for families or groups                                                                                                                                                |
| 4  | Church Hall                          | Halls or rooms in or associated with churches                                                                                                                                              |
| 5  | Club/Society                         | Venues belonging to clubs or societies, e.g. youth clubs, scouts, angling club, sailing club, life saving club                                                                             |
| 6  | Community Hall                       | Freestanding Halls or Pavilions available for community hire                                                                                                                               |
| 7  | Dance-Movement Studio                | Dance-orientated studios or centres                                                                                                                                                        |
| 8  | Education                            | Non-primary/secondary school-education orientated institutions, e.g. Adult Education, Rudolf Steiner Training Centre, Environmental Education; Shiatsu College                             |
| 9  | Fitness/Health Centre                | Fitness and Health-related centres or clubs, such as fitness centres, gyms, fitness studios, health clubs, city baths                                                                      |
| 10 | Holistic Health Clinic/Centre        | Clinics, Centres, or businesses focused on holistic health (e.g., acupuncture clinic; naturopathy; floors above holistic shops)                                                            |
| 11 | Leisure/Recreation/Sports Centre     | Leisure, Recreation, or Sports centres                                                                                                                                                     |
| 12 | Library                              | Room or space in a library                                                                                                                                                                 |
| 13 | Martial Arts School                  | School or Academy providing training in one or more of the martial arts                                                                                                                    |
| 14 | Mental/Psychological Services Centre | Centres focused on providing mental health or psychological treatment and/or services                                                                                                      |
| 15 | Miscellaneous                        | A variety of venues difficult to classify, e.g. conference centre, medical clinic, Feldenkrais studio, Rehabilitation centre, Retreat House, Clothing store, Workshop & practitioner space |

|    |                          |                                                                                                                                            |
|----|--------------------------|--------------------------------------------------------------------------------------------------------------------------------------------|
| 16 | Musculoskeletal Health   | Clinics or centres focused on treatment of musculoskeletal problems, e.g., sports medicine, physiotherapy, osteopathy, massage, myotherapy |
| 17 | Neighbourhood House      | Community centres, Community Houses, Neighbourhood Houses, or Neighbourhood centres; multicultural HUB,                                    |
| 18 | Outdoors/Public Space    | Outdoor spaces such as parks, gardens, or squares, or public indoor spaces such as Atrium                                                  |
| 19 | Pilates Studio           | Studio spaces specifically designated as Pilates studios                                                                                   |
| 20 | Primary/Secondary School | Classrooms, gyms, or other spaces in either primary (most) or secondary (one) schools                                                      |
| 21 | Residential Home         | Space used is at a residential address (e.g., home studio in garage)                                                                       |
| 22 | Senior Citizens Centre   | Senior citizens clubs, retirement villages, or veterans centres                                                                            |
| 23 | Yoga Studio/Centre       | Studios or Centres specifically designated for Yoga training                                                                               |

---
