# Supplementary material for: Diversification of Physical Activities: An Exploration of Provision Characteristics of Holistic Movement Practices in a Large Australian City
Source: MDPI journal article supplement (doi:10.3390/ijerph181910365), 2021-10-01
Supplement: s1 [file s1]

## Supplementary Table S2

Target groups with subcategories

|                                | smaller HMPs |               | TC/QG           |               | YP only     |               | Total       |               |
|--------------------------------|--------------|---------------|-----------------|---------------|-------------|---------------|-------------|---------------|
|                                | n            | %             | n               | %             | n           | %             | n           | %             |
| <b>NOT MENTIONED</b>           | <b>120</b>   | <b>80.5%</b>  | <b>244</b>      | <b>75.5%</b>  | <b>925</b>  | <b>91.5%</b>  | <b>1289</b> | <b>86.9%</b>  |
| <b>ALL</b>                     | <b>14</b>    | <b>9.4%</b>   | <b>23</b>       | <b>7.1%</b>   | <b>16</b>   | <b>1.6%</b>   | <b>53</b>   | <b>3.6%</b>   |
| All Ages                       | 2            | 14.3%         | 5               | 21.7%         | 2           | 12.5%         | 9           | 17.0%         |
| all ages & abilities           | 1            | 7.1%          |                 | 0.0%          |             | 0.0%          | 1           | 1.9%          |
| all ages & fitness             | 9            | 64.3%         | 18              | 78.3%         |             | 0.0%          | 27          | 50.9%         |
| all fitness levels             |              | 0.0%          |                 | 0.0%          | 14          | 87.5%         | 14          | 26.4%         |
| everyone                       | 2            | 14.3%         |                 | 0.0%          |             | 0.0%          | 2           | 3.8%          |
| <b>AGE</b>                     | <b>3</b>     | <b>2.0%</b>   | <b>43</b>       | <b>13.3%</b>  | <b>1</b>    | <b>0.1%</b>   | <b>47</b>   | <b>3.2%</b>   |
| adults                         |              | 0.0%          | 1               | 2.3%          |             | 0.0%          | 1           | 2.1%          |
| children                       | 1            | 33.3%         | 9               | 20.9%         |             | 0.0%          | 10          | 21.3%         |
| children & teenagers           | 1            | 33.3%         |                 | 0.0%          |             | 0.0%          | 1           | 2.1%          |
| older adults                   | 1            | 33.3%         | 14 <sup>1</sup> | 32.6%         | 1           | 100.0%        | 16          | 34.0%         |
| teens/adults                   |              | 0.0%          | 19              | 44.2%         |             | 0.0%          | 19          | 40.4%         |
| <b>GENDER</b>                  | <b>9</b>     | <b>6.0%</b>   |                 | <b>0.0%</b>   | <b>4</b>    | <b>0.4%</b>   | <b>13</b>   | <b>0.9%</b>   |
| men                            | 1            | 11.1%         |                 |               |             | 0.0%          | 1           | 7.7%          |
| mothers & children             | 3            | 33.3%         |                 |               | 1           | 25.0%         | 4           | 30.8%         |
| pregnant women                 |              | 0.0%          |                 |               | 3           | 75.0%         | 3           | 23.1%         |
| women                          | 5            | 55.6%         |                 |               |             | 0.0%          | 5           | 38.5%         |
| <b>HEALTH/WELL-BEING</b>       |              | <b>0.0%</b>   | <b>13</b>       | <b>4.0%</b>   | <b>44</b>   | <b>4.3%</b>   | <b>57</b>   | <b>3.8%</b>   |
| older adults with health needs |              |               | 10 <sup>1</sup> | 76.9%         |             | 0.0%          | 10          | 17.5%         |
| physical problems              |              |               | 3               | 23.1%         | 18          | 40.9%         | 21          | 36.8%         |
| stressed/busy                  |              |               |                 | 0.0%          | 26          | 59.1%         | 26          | 45.6%         |
| <b>PREFERENCE</b>              | <b>1</b>     | <b>0.7%</b>   |                 | <b>0.0%</b>   | <b>17</b>   | <b>1.7%</b>   | <b>18</b>   | <b>1.2%</b>   |
| various preferences            | 1            | 100.0%        |                 |               | 17          | 100.0%        | 18          | 100.0%        |
| <b>OTHER</b>                   | <b>2</b>     | <b>1.3%</b>   |                 | <b>0.0%</b>   | <b>4</b>    | <b>0.4%</b>   | <b>6</b>    | <b>0.4%</b>   |
| Chinese                        |              | 0.0%          |                 |               | 1           | 25.0%         | 1           | 16.7%         |
| embodied practitioners         | 1            | 50.0%         |                 |               |             | 0.0%          | 1           | 16.7%         |
| sport                          |              | 0.0%          |                 |               | 3           | 75.0%         | 3           | 50.0%         |
| other                          | 1            | 50.0%         |                 |               |             | 0.0%          | 1           | 16.7%         |
| <b>Total</b>                   | <b>149</b>   | <b>100.0%</b> | <b>323</b>      | <b>100.0%</b> | <b>1011</b> | <b>100.0%</b> | <b>1483</b> | <b>100.0%</b> |
