# Supplementary material for: Diversification of Physical Activities: An Exploration of Provision Characteristics of Holistic Movement Practices in a Large Australian City
Source: MDPI journal article supplement (doi:10.3390/ijerph181910365), 2021-10-01
Supplement: s1 [file s1]

## Supplementary Table S1

### Event types per HMP

|                           | weekly class |              | monthly (1<br>or 2x) class |             | one off/<br>irregular<br>class |             | workshop  |             | seasonal event |             | not<br>mentioned |             | Total       |             |
|---------------------------|--------------|--------------|----------------------------|-------------|--------------------------------|-------------|-----------|-------------|----------------|-------------|------------------|-------------|-------------|-------------|
|                           |              |              |                            |             |                                |             |           |             |                |             |                  |             |             |             |
|                           | n            | %            | n                          | %           | n                              | %           | n         | %           | n              | %           | n                | %           | n           | %           |
| 5Rhythms                  | 9            | 39.1%        | 2                          | 8.7%        | 3                              | 13.0%       | 1         | 4.3%        | 8              | 34.8%       |                  | 0.0%        | 23          | 100%        |
| Ageless Grace             | 5            | 100.0%       |                            | 0.0%        |                                | 0.0%        |           | 0.0%        |                | 0.0%        |                  | 0.0%        | 5           | 100%        |
| Authentic Movement        |              | 0.0%         | 1                          | 16.7%       | 4                              | 66.7%       | 1         | 16.7%       |                | 0.0%        |                  | 0.0%        | 6           | 100%        |
| Biodanza                  | 1            | 16.7%        | 1                          | 16.7%       | 2                              | 33.3%       | 2         | 33.3%       |                | 0.0%        |                  | 0.0%        | 6           | 100%        |
| Body-Mind Centering       |              | 0.0%         |                            | 0.0%        | 1                              | 33.3%       | 2         | 66.7%       |                | 0.0%        |                  | 0.0%        | 3           | 100%        |
| Chakradance               | 4            | 33.3%        | 1                          | 8.3%        | 6                              | 50.0%       | 1         | 8.3%        |                | 0.0%        |                  | 0.0%        | 12          | 100%        |
| Chi Ball                  | 6            | 100.0%       |                            | 0.0%        |                                | 0.0%        |           | 0.0%        |                | 0.0%        |                  | 0.0%        | 6           | 100%        |
| Dances of Universal Peace |              | 0.0%         |                            | 0.0%        |                                | 0.0%        |           | 0.0%        |                | 0.0%        | 1                | 100.0%      | 1           | 100%        |
| Dancing Freedom           | 1            | 100.0%       |                            | 0.0%        |                                | 0.0%        |           | 0.0%        |                | 0.0%        |                  | 0.0%        | 1           | 100%        |
| Eurythmy                  |              | 0.0%         |                            | 0.0%        | 2                              | 100.0%      |           | 0.0%        |                | 0.0%        |                  | 0.0%        | 2           | 100%        |
| Feldenkrais               | 26           | 78.8%        | 1                          | 3.0%        |                                | 0.0%        | 2         | 6.1%        | 4              | 12.1%       |                  | 0.0%        | 33          | 100%        |
| Gyrotonics                |              | 0.0%         |                            | 0.0%        |                                | 0.0%        |           | 0.0%        |                | 0.0%        | 2                | 100.0%      | 2           | 100%        |
| Hanna Somatics            | 4            | 40.0%        |                            | 0.0%        | 6                              | 60.0%       |           | 0.0%        |                | 0.0%        |                  | 0.0%        | 10          | 100%        |
| Kundalini Dance           | 3            | 60.0%        |                            | 0.0%        | 2                              | 40.0%       |           | 0.0%        |                | 0.0%        |                  | 0.0%        | 5           | 100%        |
| NIA                       | 23           | 95.8%        | 1                          | 4.2%        |                                | 0.0%        |           | 0.0%        |                | 0.0%        |                  | 0.0%        | 24          | 100%        |
| Open Floor                | 3            | 42.9%        | 1                          | 14.3%       | 1                              | 14.3%       | 1         | 14.3%       |                | 0.0%        | 1                | 14.3%       | 7           | 100%        |
| Pilates                   | 644          | 99.7%        |                            | 0.0%        |                                | 0.0%        |           | 0.0%        |                | 0.0%        | 2                | 0.3%        | 646         | 100%        |
| Qigong                    | 72           | 82.8%        |                            | 0.0%        | 1                              | 1.1%        | 8         | 9.2%        | 5              | 5.7%        | 1                | 1.1%        | 87          | 100%        |
| Tai Chi                   | 233          | 98.7%        | 1                          | 0.4%        | 1                              | 0.4%        |           | 0.0%        |                | 0.0%        | 1                | 0.4%        | 236         | 100%        |
| Tensegrity                | 1            | 100.0%       |                            | 0.0%        |                                | 0.0%        |           | 0.0%        |                | 0.0%        |                  | 0.0%        | 1           | 100%        |
| Trance Dance              |              | 0.0%         |                            | 0.0%        |                                | 0.0%        | 1         | 50.0%       |                | 0.0%        | 1                | 50.0%       | 2           | 100%        |
| Yoga                      | 357          | 97.8%        | 1                          | 0.3%        | 4                              | 1.1%        | 2         | 0.5%        |                | 0.0%        | 1                | 0.3%        | 365         | 100%        |
| <b>Total</b>              | <b>1392</b>  | <b>93.9%</b> | <b>10</b>                  | <b>0.7%</b> | <b>33</b>                      | <b>2.2%</b> | <b>21</b> | <b>1.4%</b> | <b>17</b>      | <b>1.1%</b> | <b>10</b>        | <b>0.7%</b> | <b>1483</b> | <b>100%</b> |
